7. Altenburg BM, Michenfelder JD, Theye RA: Acute tolerance to thiopental in canine cerebral oxygen consumption studies. *ANESTHESIOLOGY* 31:443-448, 1969
8. Alexander SC, Colton ET, Smith AL, *et al.*: The effects of cyclopropane on cerebral and systemic carbohydrate metabolism. *ANESTHESIOLOGY* 32:236-245, 1970
9. Okuda Y: A study on passage of inhalation anesthetics from blood into cerebrospinal fluid with gas chromatography. *Arch Jap Chir* 37:700-716, 1968 (Jap.)
10. Schmidt FH: Die enzymatische Bestimmung von Glucose und Fructose nebeneinander. *Klin Wschr* 39:1244-1247, 1961
11. Rosenberg JC, Rush BF: An enzymatic-spectro-photometric determination of pyruvic and lactic acid in blood. *Clin Chem* 12: 299-307, 1966
12. Cohen PJ, Wollman II, Alexander SC, *et al.*: Cerebral carbohydrate metabolism in man during halothane anesthesia. *ANESTHESIOLOGY* 25:185-189, 1964
13. Alexander SC, Wollman II, Cohen PJ, *et al.*: Cerebrovascular response to  $P_{aCO_2}$  during halothane anesthesia in man. *J Appl Physiol* 19:561-565, 1964
14. Michenfelder JD, Theye RA: Hypothermia: Effect on canine brain and whole-body metabolism. *ANESTHESIOLOGY* 29:1107-1112, 1968
15. Turner J, Lambertson CJ, Owen SC, *et al.*: Effects of 0.08 and 0.8 atmospheres of inspired  $P_{O_2}$  upon cerebral hemodynamics at a "constant" alveolar  $P_{CO_2}$  of 43 mm Hg. *Fed Proc* 16:130, 1957
16. Reivich M: Arterial  $P_{O_2}$  and cerebral hemodynamics. *Amer J Physiol* 206:25-35, 1964
17. Lassen NA: Cerebral blood flow and oxygen consumption in man. *Physiol Rev* 39:183-238, 1959
18. Smith AL, Neigh JL, Hoffman JC *et al.*: Effects of general anesthesia on autoregulation of cerebral blood flow in man. *J Appl Physiol* 29:665-669, 1970
19. Theye RA, Michenfelder JD: The effect of halothane on canine cerebral metabolism. *ANESTHESIOLOGY* 29:1113-1118, 1968
20. Alexander SC, Cohen PJ, Wollman II, *et al.*: Cerebral carbohydrate metabolism during hypocarbia in man: Studies during nitrous oxide anesthesia. *ANESTHESIOLOGY* 26: 624-632, 1965
21. Theye RA, Michenfelder JD: The effect of nitrous oxide on canine cerebral metabolism. *ANESTHESIOLOGY* 29:1119-1124, 1968
22. Cohen PJ, Alexander SC, Smith TC, *et al.*: Effects of hypoxia and normocarbina on cerebral blood flow and metabolism in conscious man. *J Appl Physiol* 23:183-189, 1967
23. Alexander SC, Smith TC, Strobel G, *et al.*: Cerebral carbohydrate metabolism of man during respiratory and metabolic alkalosis. *J Appl Physiol* 24:66-72, 1968
24. McDowall DG, Barker J, Jennett WB: Cerebrospinal fluid pressure measurements during anesthesia. *Anaesthesia* 21:189-201, 1966
25. Hagimori M: A study on cerebrospinal fluid pressure during anesthesia. Part I. Anesthesia with  $Cl_2$ -581. *Jap J Anesth* 18: 1475-1478, 1969 (Jap.)

## Respiration

**WATER HANDLING AND CHRONIC OBSTRUCTIVE LUNG DISEASE** Because of the association of edema with chronic pulmonary disease, the authors tested the responses of 20 patients with chronic obstructive airway disease to a water load of 20 ml/kg and compared these responses with those of 13 healthy subjects. It was found that the percentage of water load excreted by the patients in 4 hours was significantly lower (mean 51 per cent) than that in the control group (mean 106 per cent). Maximum urine flow, osmolar clearance, free water clearance, and creatinine clearance were also significantly

lower in the patients. A significant inverse relationship between the percentage of water load passed and arterial  $P_{CO_2}$  was found. Although glomerular filtration was reduced in the patients, the authors did not feel this to be an important factor in the impaired water-load response. The precise mechanism for the impairment remains unclear, and further studies are in progress to examine proximal tubular function and vasopressin activity under these circumstances. (White, R. J., and Woodings, D. F.: *Impaired Water Handling in Chronic Obstructive Airway Disease, Brit. Med. J.* 2: 561 (June) 1971.)
